# Supplementary material for: Different Effects of Guanine Nucleotides (GDP and GTP) on Protein-Mediated Mitochondrial Proton Leak
Source: PubMed Central journal article supplement (PMC4056835; doi:10.1371/journal.pone.0098969), 2014-06-06
Supplement: pone.0098969.s001.pdf [file pone.0098969.s001.pdf]

Figure S1

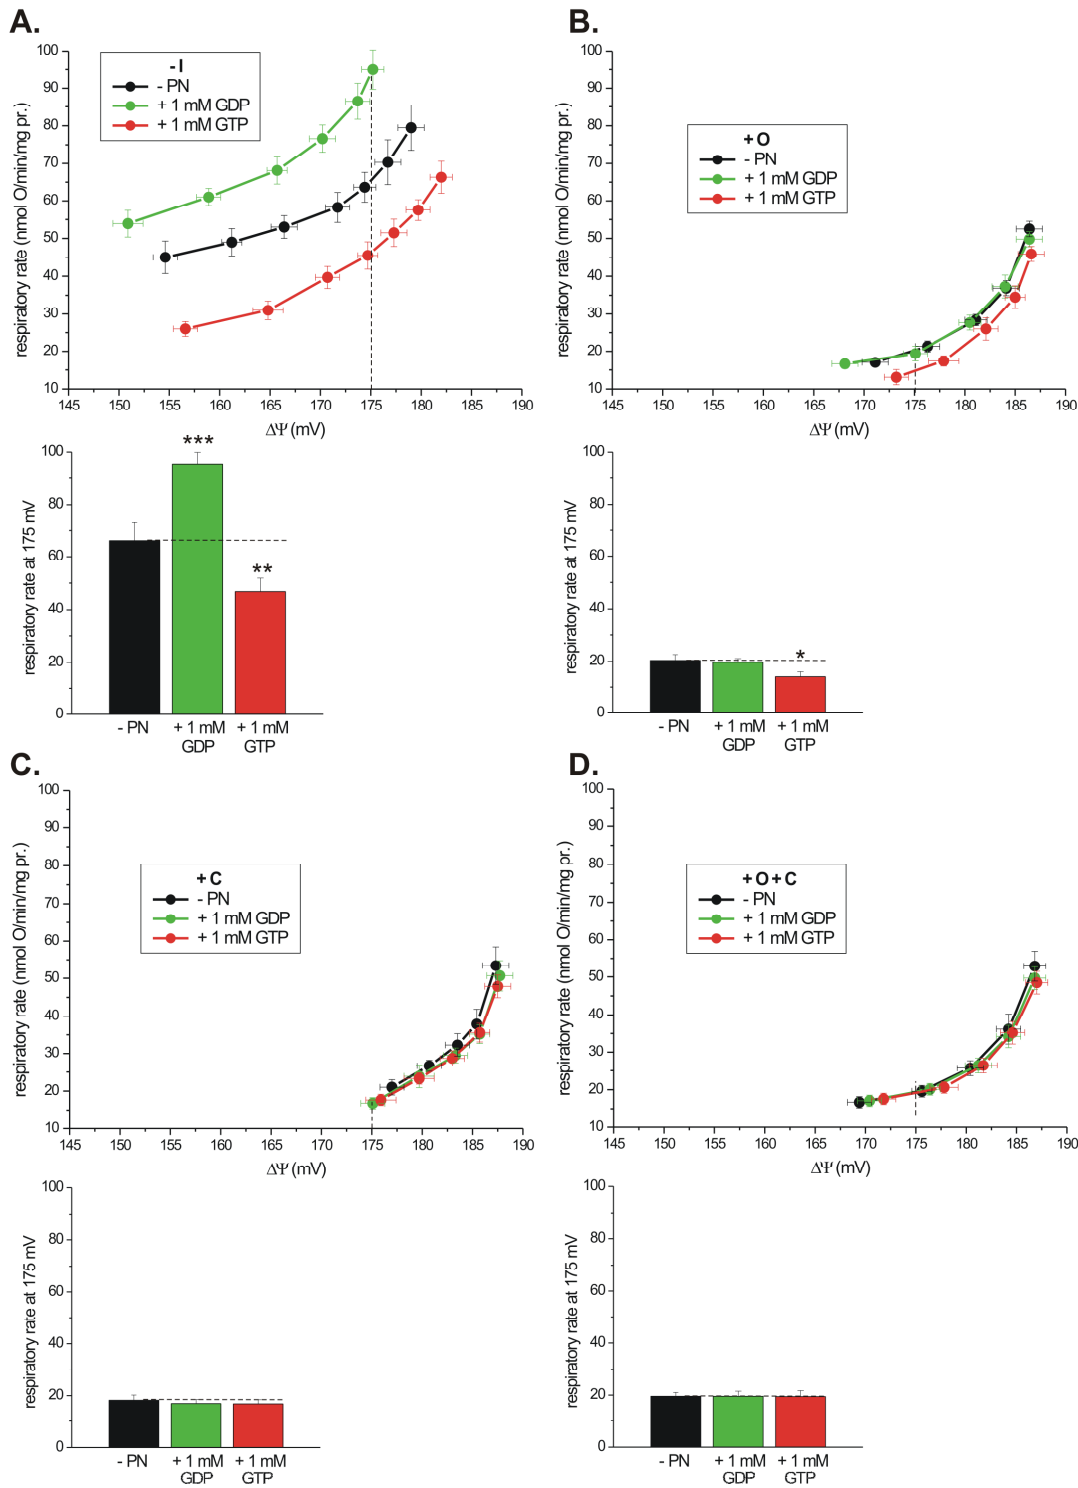

**Figure S1.** The effect of GDP (1 mM) and GTP (1 mM) on proton leak of rat kidney mitochondria in the absence of linoleic acid. The relationships between the respiratory rate and  $\Delta\Psi$  (proton leak kinetics) are shown. The measurements were performed in the absence of OXPHOS inhibitors (– I) (A), in the presence of oligomycin (+ O) alone (B), in the presence of CATR (+ C) alone (C), and with the simultaneous presence of both inhibitors (+ O + C) (D). The oxidation of succinate (5 mM) was gradually decreased by increasing the concentration of malonate (0.3-1.6 mM). The mitochondria (2 mg) were incubated in 2.8 ml of incubation medium supplemented with rotenone (4  $\mu$ M) and ATP (0.8 mM). The inserts of column plots show the respiratory rates at the highest common  $\Delta\Psi$  (175 mV) for the same dataset. The values are the means  $\pm$  S.D. of 6 independent experiments (mitochondrial isolations).

Figure S2

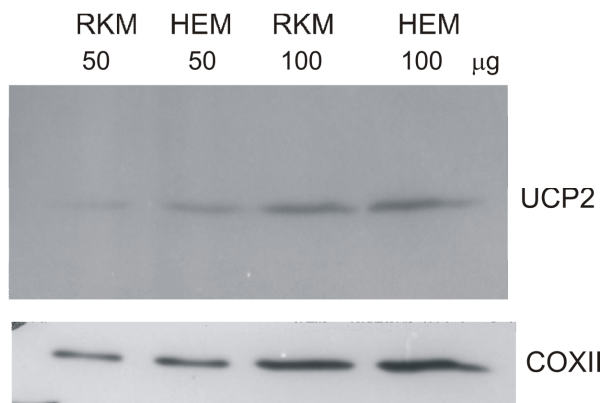

**Figure S2.** Western blot analysis of mitochondria isolated from rat kidney (RKM) and human endothelial cells (HEM) using anti-UCP2 (sc-6525, Santa Cruz Biotechnology) antibodies. Detection of mitochondrial marker (cytochrome oxidase, COXII, MS404, MitoScience) was performed as a control. Experimental conditions as in [24]. Different amounts of protein (50 or 100  $\mu$ g) were loaded into each lane (as indicated).
